# Supplementary material for: Construction of Ni3+-rich nanograss arrays for boosting alkaline water oxidation
Source: Royal Society of Chemistry journal article supplement (doi:10.1039/d2cc02083a), 2022-01-01
Supplement: d2cc02083a1.pdf [file d2cc02083a1.pdf]

## Supporting Information

### **Construction of Ni<sup>3+</sup>-rich nanograss arrays for booting alkaline water oxidation**

Ruirui Zhang, Jingce Bi, Junbiao Wu, Zhuopeng Wang, Xia Zhang and Yide Han\*

Department of Chemistry, College of Science, Northeastern University, Shenyang,  
110819, China

\*Corresponding author: Dr. Yide Han, Email: [hanyide@mail.neu.edu.cn](mailto:hanyide@mail.neu.edu.cn)

## **Experimental section**

### **Chemicals and reagents**

Nickel (II) nitrate hexahydrate ( $\text{Ni}(\text{NO}_3)_2 \cdot 6\text{H}_2\text{O}$ ), thioacetamide (TAA), sodium orthovanadate ( $\text{Na}_3\text{VO}_4 \cdot \text{H}_2\text{O}$ ), sodium molybdate dihydrate ( $\text{Na}_2\text{MoO}_4 \cdot 2\text{H}_2\text{O}$ ), potassium hydroxide (KOH), ethanol and methanol were purchased from Sinopharm Chemical Reagent Co., Ltd. 1,3,5-Benzenetricarboxylic acid (BTC) was purchased from Aladdin. Hydrochloric acid (HCl) and acetone ( $\text{CH}_3\text{COCH}_3$ ) were acquired from Tianjin Yongda Chemical Reagents. Nickel foam (NF) was obtained from Changde Liyuan New Material Co., Ltd. All reagents were commercially available and used without further purification.

### **Preparation of Ni-BTC@NF**

In order to remove the surface oxides, NF was cleaned by consecutive sonication in acetone, HCl aqueous solution ( $3 \text{ mol} \cdot \text{L}^{-1}$ ) and water for 10 min, respectively. Afterwards, 0.325 g of  $\text{Ni}(\text{NO}_3)_2 \cdot 6\text{H}_2\text{O}$  and 0.125 g of BTC were dispersed in 18 mL of methanol and stirred magnetically for 30 min. The obtained mixture was transferred into a 25 mL Teflon-lined stainless-steel autoclave reactor, followed by the addition of a piece of NF ( $2 \times 3 \text{ cm}^2$ ). After that, the autoclave was maintained at  $150 \text{ }^\circ\text{C}$  for 24 h. After the autoclave cooled down to room temperature, the as-obtained Ni-BTC@NF was taken out and rinsed thoroughly with DI water and ethanol for several times, and then dried in an oven at  $60 \text{ }^\circ\text{C}$  for 12 h.

### **Preparation of Mo-Ni-BTC@NF**

At first, 60 mg of  $\text{Na}_2\text{MoO}_4 \cdot 2\text{H}_2\text{O}$  was dispersed in 25 mL of the mixed solution containing of 20 mL of distilled water and 5 mL of ethanol under magnetic stirring for 30 min. Then, the pre-prepared Ni-BTC@NF was immersed in the above solution and kept at  $85 \text{ }^\circ\text{C}$  for 10 min. After cooling down to room temperature, Mo-Ni-BTC@NF was taken out and washed with DI water and ethanol successively for three times, and then dried in an oven at  $60 \text{ }^\circ\text{C}$  for 12 h in vacuum.

### **Preparation of Mo-NiVS@NF**

Firstly, Mo-Ni-BTC@NF was immersed in 15 mL aqueous solution containing 50 mg of TAA and 50 mg of  $\text{Na}_3\text{VO}_4 \cdot \text{H}_2\text{O}$ . Then the solution together with Mo-Ni-BTC@NF was transferred into a 25 mL Teflon-lined stainless autoclave and kept at 180 °C for 4 h. The product was rinsed by DI water and ethanol successively for three times. After drying in an oven at 60 °C for 12 h, Mo-NiVS@NF catalyst was obtained.

### **Preparation of Mo-NiS@NF, NiVS@NF and NiS@NF**

For comparison, Mo-NiS@NF, NiVS@NF and NiS@NF were synthesized using the similar method. Compared with the method of Mo-NiVS@NF, Mo-NiS@NF was prepared through the above method without  $\text{Na}_3\text{VO}_4 \cdot \text{H}_2\text{O}$ . In turn, NiVS@NF and NiS@NF were also prepared.

### **Characterizations**

The powder X-ray diffraction (PXRD) patterns were measured on X'Pert Pro MRDDY2094 with Cu-K $\alpha$  radiation ( $\lambda = 1.5418 \text{ \AA}$ ). Scanning electron microscopy (SEM) results were characterized by the SU8010. Transmission electron microscopy (TEM), high-resolution HR-TEM and EDX elemental mapping images were recorded on Talos F200x (Thermo Fischer). X-ray photoelectron spectroscopy (XPS) spectra were carried out on a Thermo Scientific K-Alpha. Raman spectrometer (XploRA, excitation wavelength of 532 nm)

## Electrochemical measurements

All electrochemical experiments were performed on CHI660E electrochemical workstation with 1 M KOH aqueous solution as electrolyte. The oxygen evolution reaction (OER) performances were measured with a three-electrode system, in which as-prepared samples were employed as the working electrode, platinum plate as the counter electrode and Hg/HgO as reference electrode. The test potentials were corrected with the equation  $E_{\text{vs. RHE}} = E_{\text{vs. SCE}} + 0.059\text{pH} + 0.099\text{V}$ . The cyclic voltammetry (CV) test was measured from 0 V to 0.8 V with a scan rate of  $5 \text{ mV s}^{-1}$ . The reversible potentials for OER are 1.23 V vs. standard hydrogen electrode (SHE). Hence, the equations  $\eta_{\text{OER}} = E_{\text{RHE}} - 1.23 \text{ V}$  can be used for OER to calculate the overpotentials at a desired current density. Tafel plots were obtained from CV curves by using the equation:  $\eta = b \log(j) + a$ , where  $\eta$  is overpotential,  $j$  is the current density,  $b$  is the Tafel slope. Double-layer capacitance values were calculated based on cyclic voltammetry (CV) curves at scan rate from 10 to  $100 \text{ mV s}^{-1}$  under the potential from 0.1 V to 0.3 V. Electrochemical impedance spectroscopy (EIS) measurements were carried out according to a certain potential with the frequency of  $10^6 \text{ Hz} \sim 1 \text{ KHz}$ . In multi-current process testing, the current density increases from  $20 \text{ mA}\cdot\text{cm}^{-2}$  to  $240 \text{ mA}\cdot\text{cm}^{-2}$  and remains steady for each period of 500 s. Durability was performed by chronopotentiometry at a  $10 \text{ mA cm}^{-2}$  constant current.

## **TOF calculations**

TOF can be calculated by using the electrochemistry method.<sup>1,2</sup> A linear relationship between the oxidation current densities for redox species and the scan rates can be obtained from the cyclic voltammograms of Mo-NiVS@NF. The quantity of the active sites ( $m$ ) is calculated by the formula:  $\text{slope} = n^2F^2m/4RT$ , where  $n$  represents the amount of electron transfer denoted as 1,  $F$  is the Faradaic constant ( $96485 \text{ C mol}^{-1}$ ),  $R$  is the ideal gas constant ( $8.314 \text{ J mol}^{-1} \text{ K}^{-1}$ ) and  $T$  is the absolute temperature ( $298 \text{ K}$ ). The TOF is calculated by the following equation:  $\text{TOF} = jA/4Fm$ , where  $J$  is the current density;  $A$  is the geometrical electrode area of the electrode, and 4 indicates the moles of electron consumption for one mole oxygen evolution.

## **Determination of Faradaic efficiency**

The Faradaic efficiency of a catalyst in OER is defined as the ratio of the amount of  $\text{O}_2$  evolved during the experiments to the amount of the theoretical  $\text{O}_2$  yield.<sup>3,4</sup> The actual  $\text{O}_2$  output was obtained by water drainage method. The system was then tested under a current density of  $50 \text{ mA cm}^{-2}$  for 3600 s. And then calculated the moles of  $\text{O}_2$  generated from the reaction with an ideal gas law:  $pV = nRT$ , where  $p$  is the pressure,  $V$  is the gas volume,  $T$  is the temperature,  $n$  is the amount of substance, and  $R$  is the ideal gas constant. As for the theoretical value, we assumed that 100% current efficiency occurs during the reaction, which means only the OER process takes place at the working electrode. We can then calculate the theoretical amount of  $\text{O}_2$  evolved by applying the Faraday law:  $\text{Faraday efficiency} = mnF / It$ , where  $m$  is the mole number of the  $\text{O}_2$ ,  $n$  is the number of reaction electrons,  $F$  is the Faraday constant,  $I$  is the current, and  $t$  is the time.

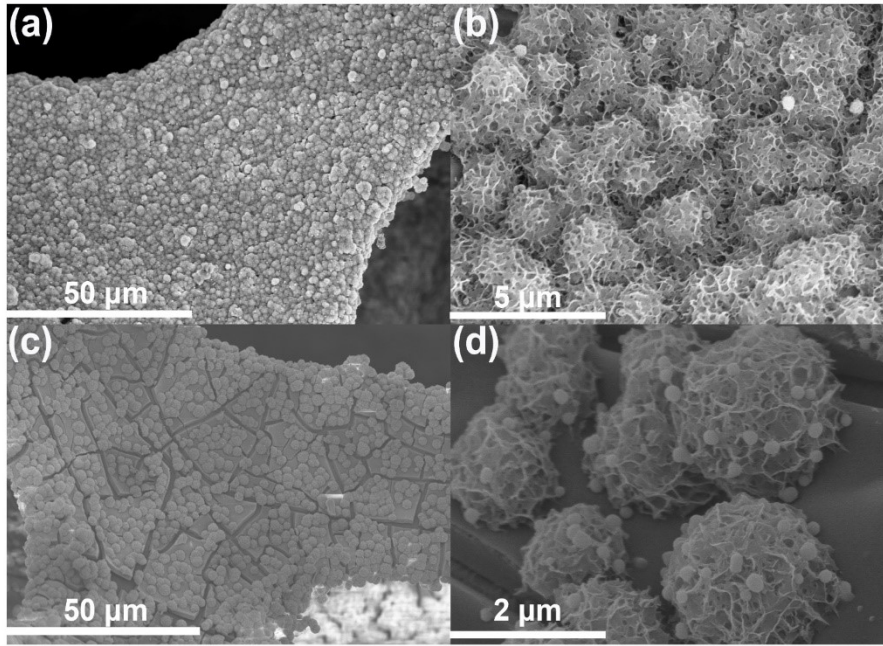

Fig. S1 SEM images of Ni-BTC@NF(a) and (b), Mo-Ni-BTC@NF (c) and (d).

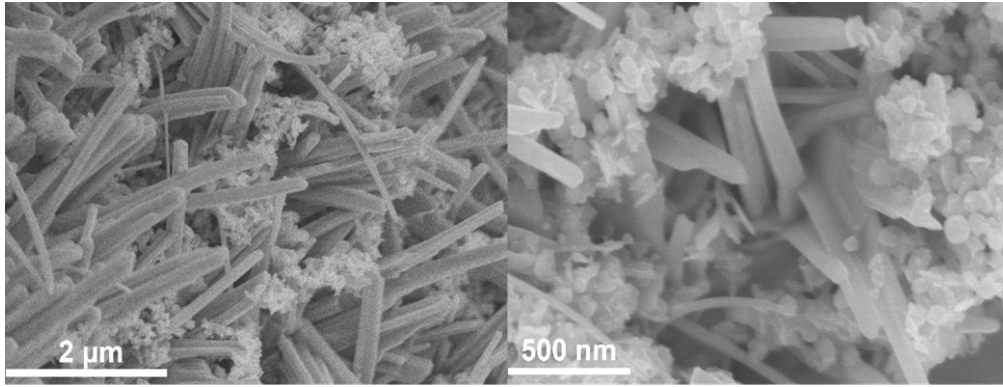

Fig. S2 SEM images of Mo-NiVS@NF.

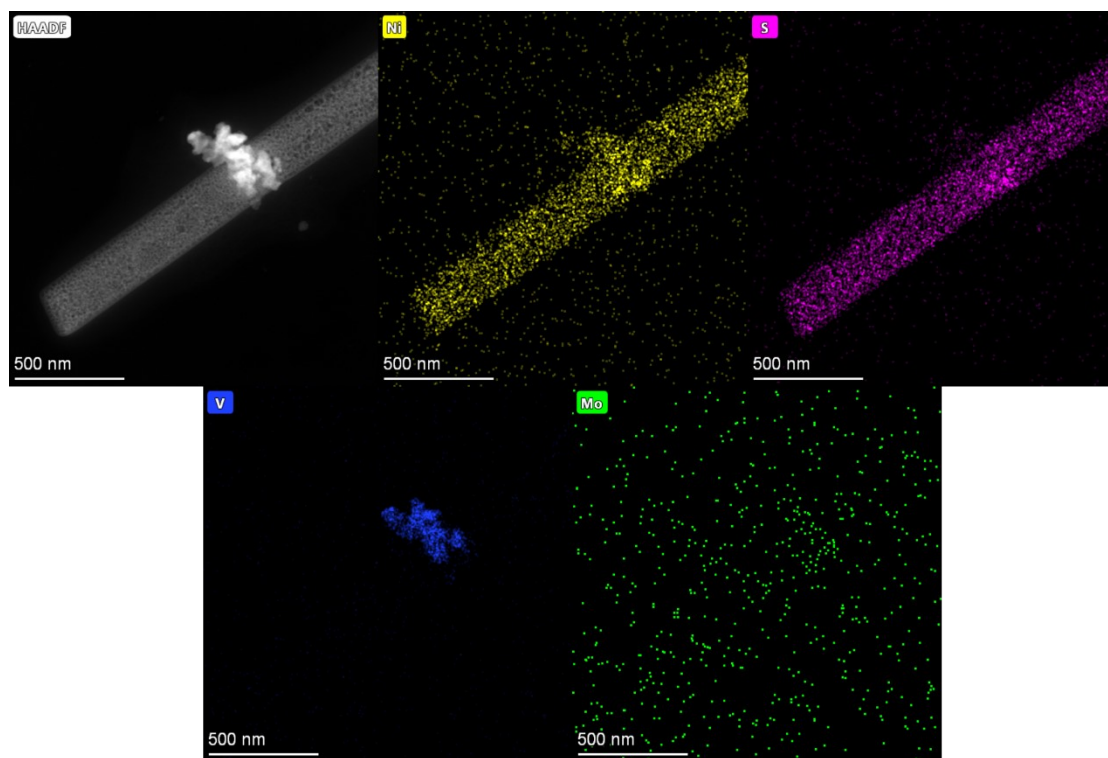

Fig. S3 EDS elemental mapping images of Ni, S, V and Mo in Mo-NiVS@NF.



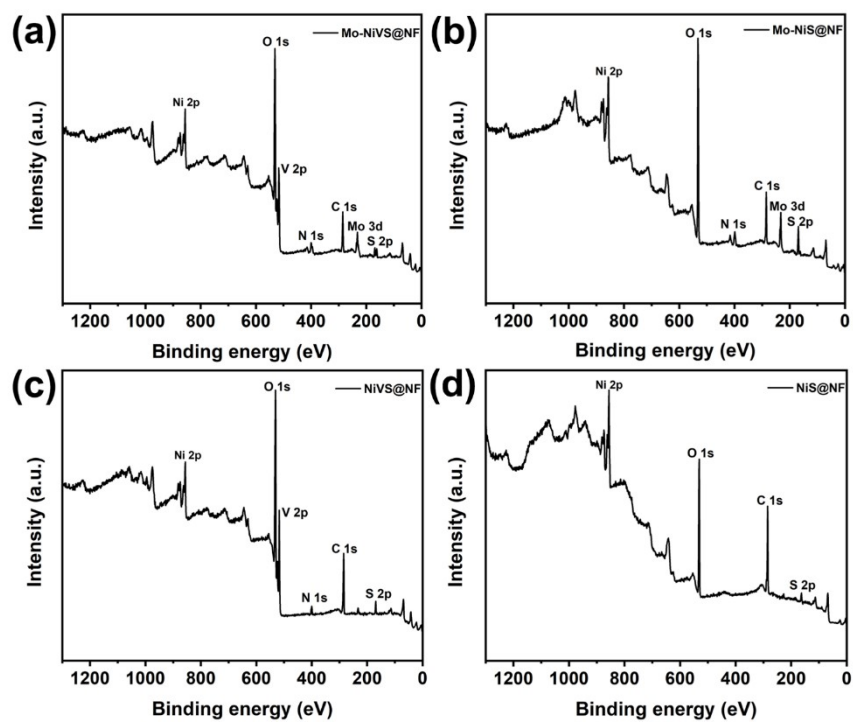

Fig. S4 The survey XPS spectra of Mo-NiVS@NF (a), Mo-NiS@NF (b), NiVS@NF(c) and NiS@NF(d).

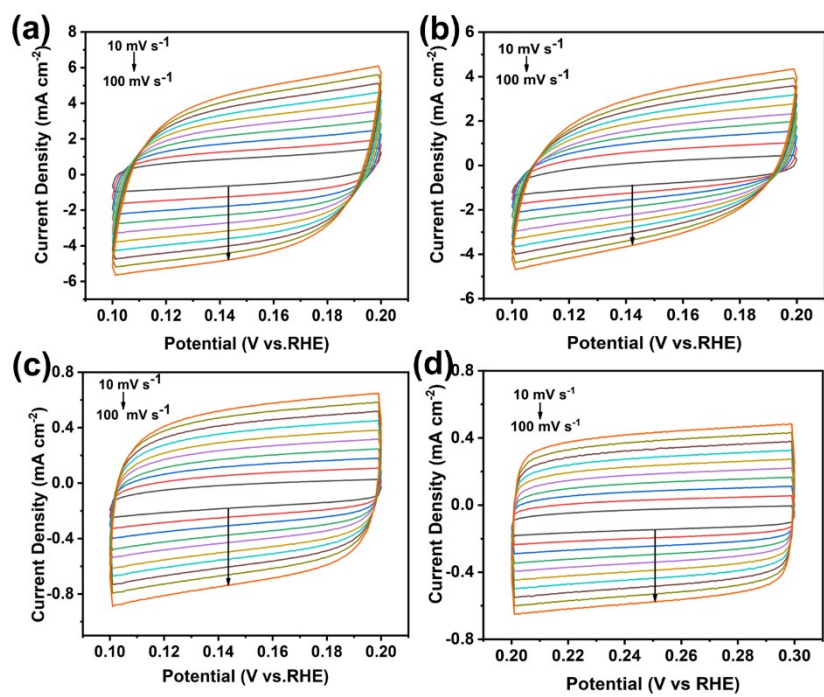

Fig. S5 CVs of Mo-NiVS@NF (a), NiVS@NF (b), Mo-NiS@NF (c) and NiS@NF (d) at the scan rate range from 10 to 100  $\text{mV} \cdot \text{s}^{-1}$ .

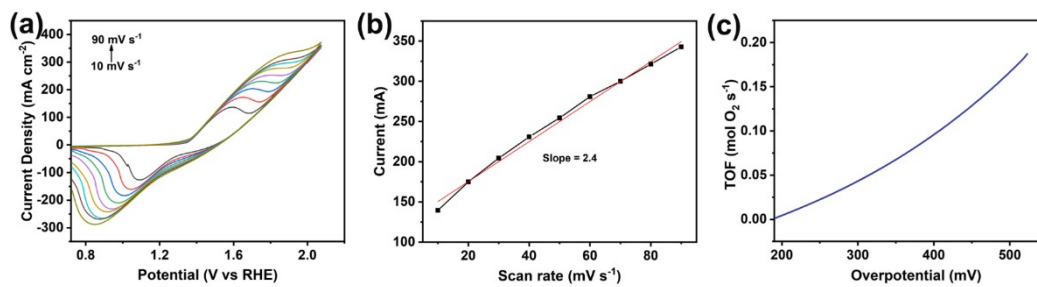

Fig. S6 (a) CVs of Mo-NiVS@NF with different scan rates increasing from 10 to 90 mV s<sup>-1</sup>, (b) a linear plot between the oxidation currents and scan rates and (c) plot of the TOF of Mo-NiVS@NF as a function of the overpotential.

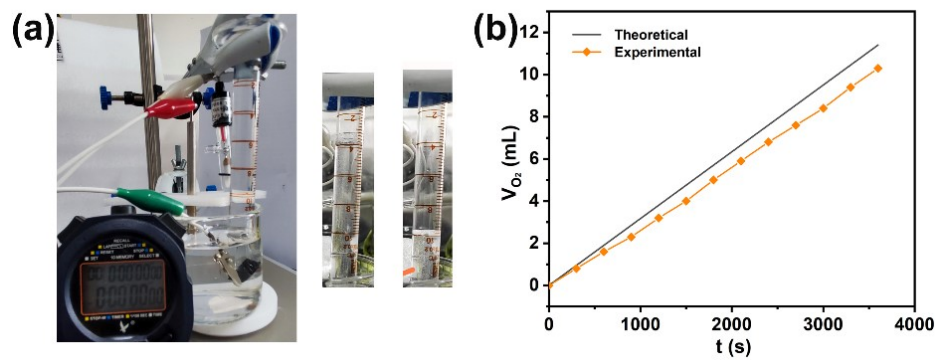

Fig. S7 (a) Experimental device, and (b) theoretical and experimental data of the Faradaic efficiency at 50 mA in 1 M KOH of Mo-NiVS@NF.

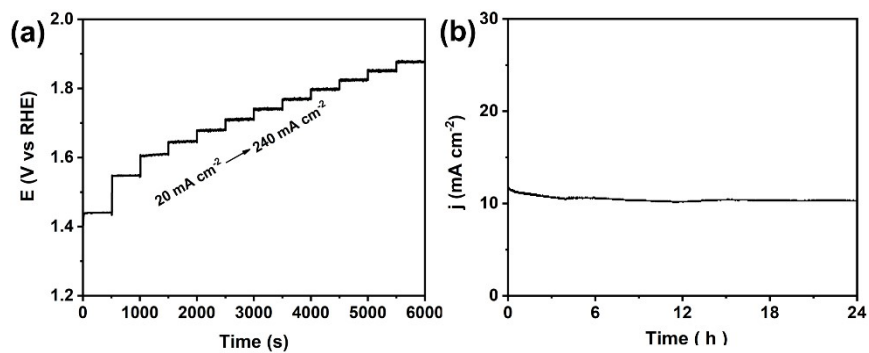

Fig. S8 (a) Multi-current process of Mo-NiVS@NF for OER in 1 M KOH ranging from  $20 \text{ mA cm}^{-2}$  to  $240 \text{ mA cm}^{-2}$ , (b) Chronopotentiometric curve at  $10 \text{ mA cm}^{-2}$  over 24 h for Mo-NiVS@NF.

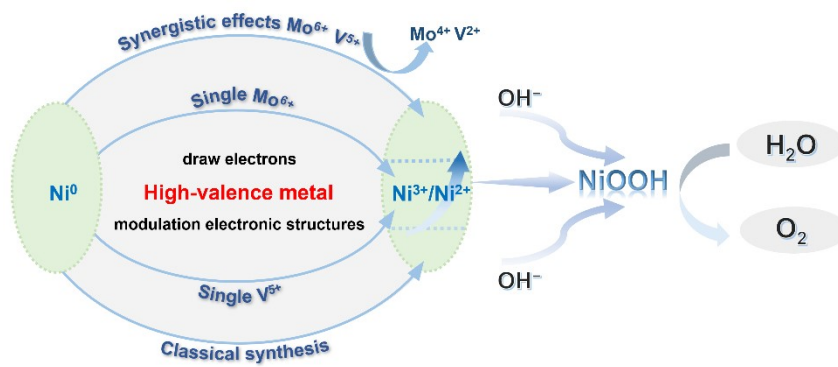

Fig. S9 The mechanism of as-obtained Mo-NiVS@NF for OER.

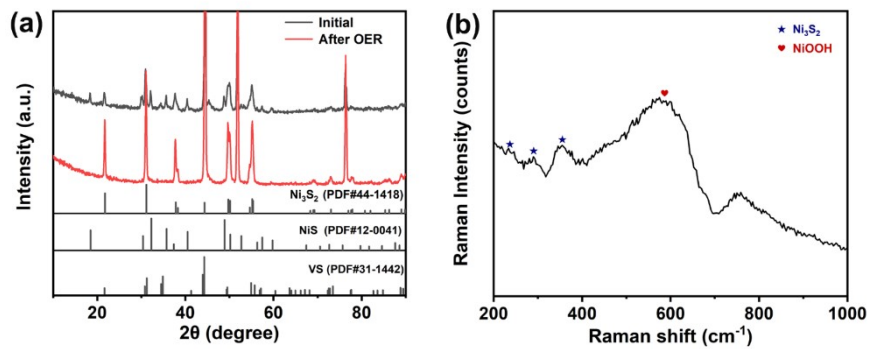

Fig. S10 (a) XRD patterns and (b) Raman spectra of the Mo-NiVS@NF after OER stability test.

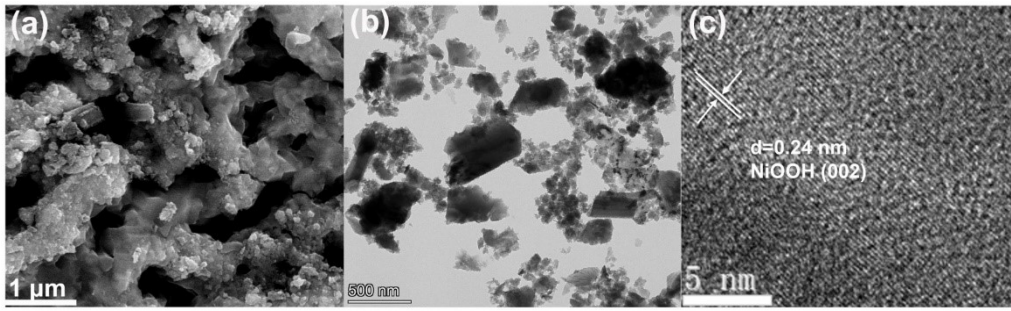

Fig. S11 (a) SEM, (b) TEM and (c) HRTEM images of Mo-NiVS@NF after OER stability test.



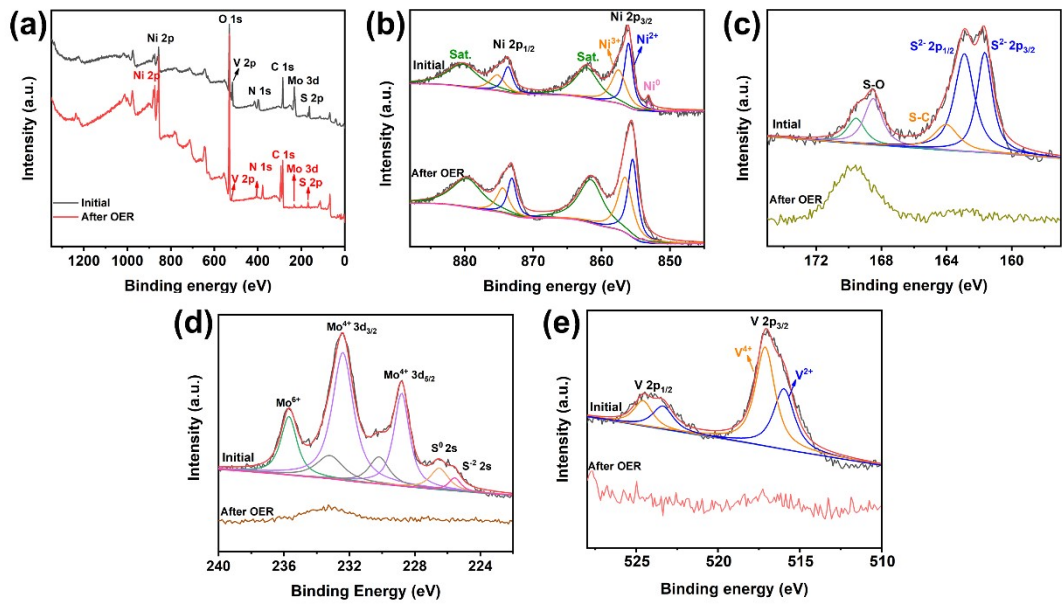

Fig. S12 The survey XPS spectra (a), high-resolution XPS spectra of Mo-NiVS@NF before and after OER stability test (b-e).

Table S1. Comparison of OER performance for Mo-NiVS@NF with other NiS-based electrocatalysts in 1 M KOH solution.

| Catalyst                                                                     | Current density<br>(mA cm <sup>-2</sup> ) | Overpotential<br>(mV vs<br>RHE) | Tafel slope<br>(mV dec <sup>-1</sup> ) | Reference        |
|------------------------------------------------------------------------------|-------------------------------------------|---------------------------------|----------------------------------------|------------------|
| <b>Mo-NiVS@NF</b>                                                            | <b>10</b>                                 | <b>217</b>                      | <b>53.6</b>                            | <b>This work</b> |
| F-Ni <sub>3</sub> S <sub>2</sub>                                             | 10                                        | 239                             | 36                                     | 5                |
| Ni <sub>3</sub> S <sub>2</sub> /MoS <sub>2</sub>                             | 10                                        | 260                             | 68                                     | 6                |
| NiS/VS                                                                       | 10                                        | 240                             | 71.2                                   | 7                |
| Ni <sub>3</sub> S <sub>2</sub> @FeNi <sub>2</sub> S <sub>4</sub> @NF         | 10                                        | 235                             | 92                                     | 8                |
| FCC-Ni-NiS/NS-rGO                                                            | 10                                        | 254                             | 112                                    | 9                |
| MnCo@NiS                                                                     | 10                                        | 286                             | 31.5                                   | 10               |
| Co <sub>3</sub> O <sub>4</sub> @Ni <sub>3</sub> S <sub>2</sub> /NF           | 20                                        | 260                             | 121.7                                  | 11               |
| Ni <sub>3</sub> S <sub>2</sub> .Co <sub>9</sub> S <sub>8</sub>               | 20                                        | 294                             | 80                                     | 12               |
| Ni <sub>3</sub> S <sub>2</sub> @FeNi-<br>NiFe <sub>2</sub> O <sub>4</sub> /C | 10                                        | 280                             | 33.9                                   | 13               |
| Ni-Ni <sub>3</sub> S <sub>2</sub>                                            | 10                                        | 284.7                           | 56                                     | 14               |
| Ni <sub>3</sub> S <sub>2</sub> @C@CNS                                        | 10                                        | 298                             | 51.3                                   | 15               |
| Fe- Ni <sub>3</sub> S <sub>2</sub> /FeNi                                     | 10                                        | 282                             | 54                                     | 16               |
| BG@Ni/Ni <sub>3</sub> S <sub>2</sub>                                         | 10                                        | 320                             | 41                                     | 17               |
| Fe-doped Ni <sub>3</sub> S <sub>2</sub>                                      | 10                                        | 295                             | 71                                     | 18               |
| NF-Ni <sub>3</sub> S <sub>2</sub> /MnO <sub>2</sub>                          | 10                                        | 260                             | 61                                     | 19               |

## References

1. X. Luan, H. Du, Y. Kong, F. Qu and L. Lu, *Chem. Commun.*, 2019, **55**, 7335-7338.
2. M. Xie, Y. Ma, D. Lin, C. Xu, F. Xie and W. Zeng, *Nanoscale*, 2020, **12**, 67-71.
3. T. Gao, C. Zhou, Y. Zhang, Z. Jin, H. Yuan and D. Xiao, *J. Mater. Chem. A*, 2018, **6**, 21577-21584.
4. J. Kibsgaard and T. F. Jaramillo, *Angew. Chem. Int. Ed. Engl.*, 2014, **53**, 14433-7.
5. Q. Xu, M. Chu, M. Liu, J. Zhang, H. Jiang and C. Li, *Chem. Eng. J.*, 2021, **411**, 128488.
6. C. Wang, X. Shao, J. Pan, J. Hu and X. Xu, *Appl. Catal. B: Environ.*, 2020, **268**, 118435.
7. K. Bao, Y. Yan, T. Liu, T. Xu, J. Cao and J. Qi, *Inorg. Chem. Front.*, 2020, **7**, 4924-4929.
8. Y. Yang, H. Meng, C. Kong, S. Yan, W. Ma, H. Zhu, F. Ma, C. Wang and Z. Hu, *J. Colloid Interface Sci.*, 2021, **599**, 300-312.
9. M. B. Zakaria, Y. Guo, J. Na, R. Tahawy, T. Chikyow, W. A. El-Said, D. A. El-Hady, W. Alshitari, Y. Yamauchi and J. Lin, *ChemSusChem*, 2020, **13**, 3269-3276.
10. X. Wang, L. Li, L. Xu, Z. Wang, Z. Wu, Z. Liu and P. Yang, *J. Power Sources*, 2021, **489**, 229525.
11. Y. Gong, Z. Xu, H. Pan, Y. Lin, Z. Yang and X. Du, *J. Mater. Chem. A*, 2018, **6**, 5098-5106.
12. R. Zhang, L. Cheng, Z. Wang, F. Kong, Y. Tsegazab, W. Lv and W. Wang, *Appl. Surf. Sci.*, 2020, **526**, 146753.
13. L. Xu, S. Ali Shah, H. Khan, R. Sayyar, X. Shen, I. Khan, A. Yuan, W. Yaseen, Z. Ali Ghazi, A. Naeem, H. Ullah, X. Li and C. Wang, *J. Colloid Interface Sci.*, 2022, **617**, 1-10.
14. Y. Lin, G. Chen, H. Wan, F. Chen, X. Liu and R. Ma, *Small*, 2019, **15**, 1900348.
15. M. Al-Mamun, H. Yin, P. Liu, X. Su, H. Zhang, H. Yang, D. Wang, Z. Tang, Y. Wang and H. Zhao, *Nano Res.*, 2017, **10**, 3522-3533.
16. C. Z. Yuan, Z. T. Sun, Y. F. Jiang, Z. K. Yang, N. Jiang, Z. W. Zhao, U. Y. Qazi, W. H. Zhang and A. W. Xu, *Small*, 2017, **13**, 1604161.
17. K. Zhang, X. Min, T. Zhang, M. Si, J. Jiang, L. Chai and Y. Shi, *ACS Appl. Mater. Interfaces*, 2020, **12**, 54553-54562.
18. Y. Zhu, H. Yang, K. Lan, K. Iqbal, Y. Liu, P. Ma, Z. Zhao, S. Luo, Y. Luo and J. Ma, *Nanoscale*, 2019, **11**, 2355-2365.
19. Y. Xiong, L. Xu, C. Jin and Q. Sun, *Appl. Catal. B: Environ.*, 2019, **254**, 329-338.
